# Supplementary material for: In cell scalaradial interactome profiling using a bio-orthogonal clickable probe
Source: Royal Society of Chemistry journal article supplement (doi:10.1039/c4cc00989d), 2014-01-01
Supplement: c4cc00989d1.pdf [file c4cc00989d1.pdf]

## In cell Scalarial Interactome Profiling Using a Bio-Orthogonal Clickable Probe

C. Cassiano,<sup>a</sup> L. Margarucci,<sup>a</sup> R. Esposito,<sup>a</sup> R. Riccio,<sup>a</sup> A. Tosco,<sup>a</sup> A. Casapullo,<sup>a</sup> \* M.C. Monti<sup>a</sup> \*

<sup>a</sup>Department of Pharmacy, University of Salerno, Via Giovanni Paolo II 132, 84084, Fisciano, Salerno, Italy email: [mcmonti@unisa.it](mailto:mcmonti@unisa.it), [casapullo@unisa.it](mailto:casapullo@unisa.it) tel: 0039-089-969243 fax: 0039-089-966202.

### Supporting Information

#### SLD reaction with 11-azido-3,6,9-trioxaundecan-1-amine (TRX-Az) linker:

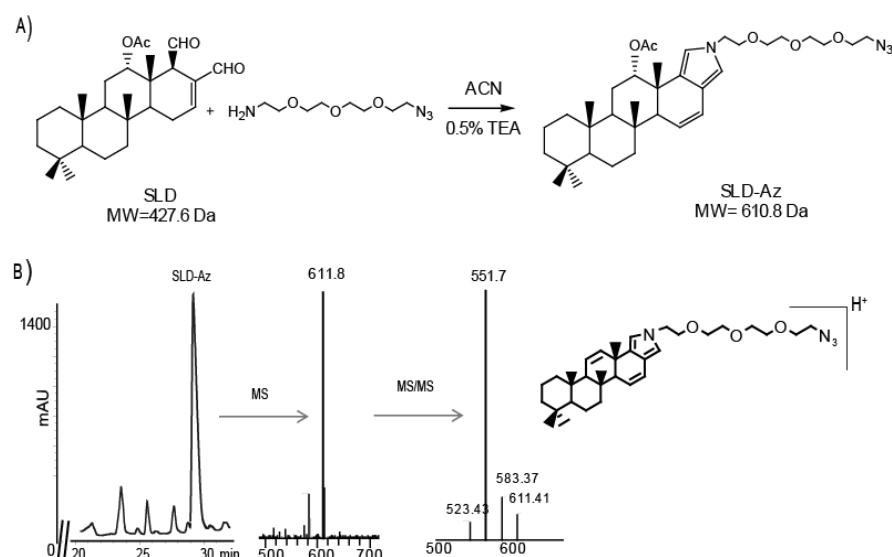

**Figure S1.** Panel A: Reaction between SLD and TRX-Az. Panel B: HPLC-UV trace, MS and MS/MS spectra of the reaction main product. In the MS spectrum, the base peak, at  $m/z$  of 611.8, corresponds to the protonated SLD-Az adduct, while its fragment at  $m/z$  of 551.7, in MS/MS spectrum, is generated by the loss of acetic acid.

**Cu(I) catalyzed cyclization of SLD-Az with 4-pentyn-1-amine (PINA linker):**

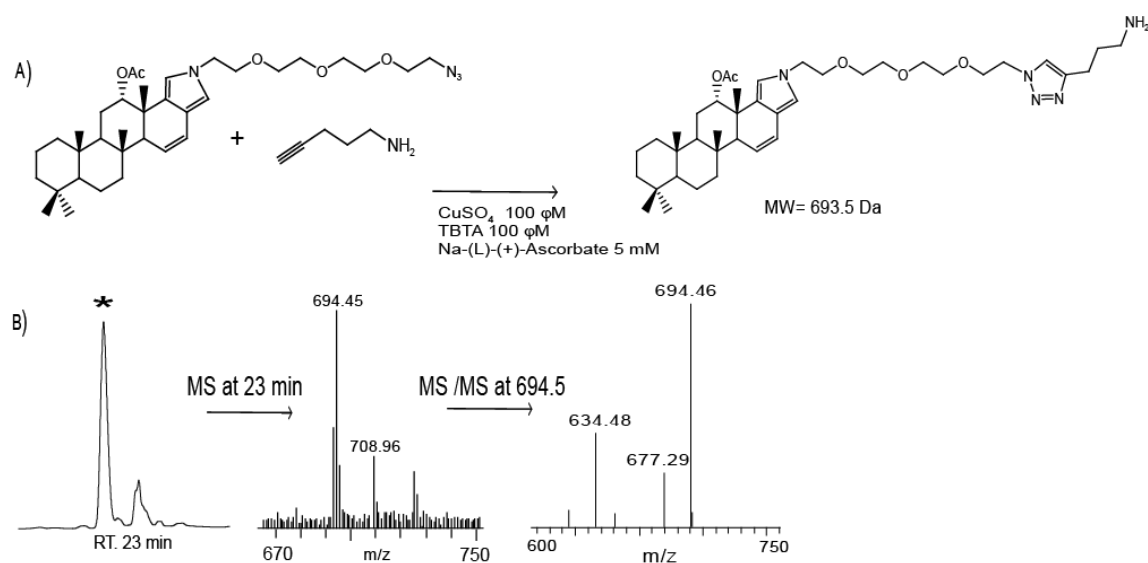

**Figure S2.** Panel A: SLD-Az reaction with the linker PINA. Panel B: HPLC-UV trace, MS and MS/MS spectra of the main product. In the MS spectrum, the base peak at  $m/z$  of 694.5 corresponds to the protonated click-chemistry adduct between SLD-Az and PINA, while its fragments at  $m/z$  of 677.3 and 634.5, in the MS/MS spectrum, descend from the loss of ammonia and acetic acid, respectively.

**SLD reaction with the 2-(2-amino-ethyl-disulfanyl)-ethyl-amine (TIOS) linker, CDI agarose matrix modification and *in vitro* affinity purification of bee venom PLA<sub>2</sub>:**

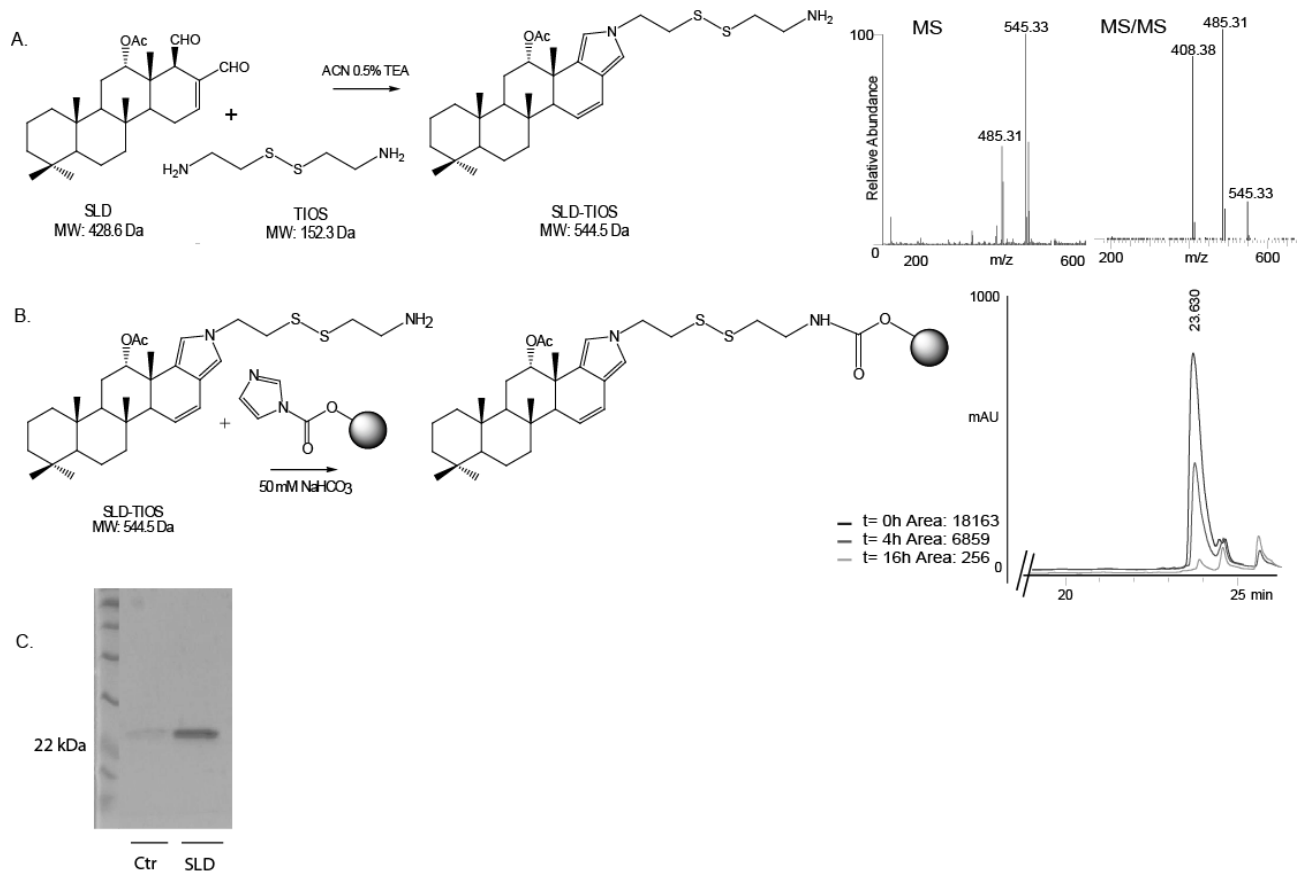

**Figure S3.** Panel A: SLD reaction with TIOS and MS and MS/MS spectra. In the MS spectra, the base peak at  $m/z$  545.3 corresponds to the protonated SLD-TIOS adduct, while its fragment at  $m/z$  of 485.3 descends from the spontaneous loss of acetic acid. MS/MS spectra also show an additional peak at  $m/z$  408.3, descending from the loss of 2-aminoethanethiol. Panel B: SLD-TIOS immobilization on CDI agarose solid matrix. HPLC-UV trace at 220 nm of the reaction supernatant after 0, 4, 16 h of incubation. Panel C: *In vitro* fishing for partners of SLD immobilized on CDI resin on a sample containing bovine serum albumin (66 kDa), lysozyme (14 kDa) and bee venom PLA<sub>2</sub> (around 20 kDa). SLD is able to fish out bee venom PLA<sub>2</sub> which is its main known partner.

### **In vitro SLD interacting targets:**

A crude extract sample of HeLa cells was incubated for 1h at 4°C with an aliquot of the SLD-bearing matrix to allow the interactions between the compound and its potential macromolecular partners. The amount of un-specifically interacting proteins was reduced by several washing steps of the matrix beads, while the tightly bound proteins were released after the disulphide bond cleavage with DTT and then resolved by 12% SDS-PAGE (Fig. S4). In order to filter the specific and residual non-specific interactions, a control experiment was performed using the beads bearing the acetylated linker. The gel lanes were divided in few pieces and subjected to an *in situ* digestion protocol. The peptide mixtures were analyzed through nano-flow RP-HPLC MS/MS and the proteins identification was performed by submitting the peak lists to the Mascot database. The list of the SLD interacting proteins was refined by removing the hits shared with the control experiments.

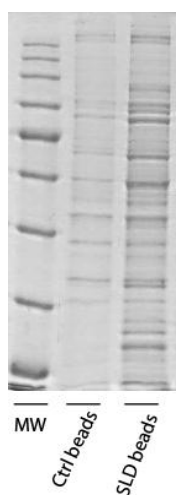

| n. | SwissProt   | Proteins                                                   | Matches |
|----|-------------|------------------------------------------------------------|---------|
| 1  | PRDX1_HUMAN | Peroxiredoxin-1                                            | 22      |
| 2  | EF1A1_HUMAN | Elongation factor 1-alpha 1                                | 19      |
| 3  | 1433E_HUMAN | 14-3-3 protein epsilon                                     | 18      |
| 4  | 1433B_HUMAN | 14-3-3 protein beta/alpha                                  | 16      |
| 5  | 1433T_HUMAN | 14-3-3 protein theta                                       | 14      |
| 6  | 1433Z_HUMAN | 14-3-3 protein zeta/delta                                  | 12      |
| 7  | 1433G_HUMAN | 14-3-3 protein gamma                                       | 11      |
| 8  | 1433F_HUMAN | 14-3-3 protein eta                                         | 11      |
| 9  | PRDX2_HUMAN | Peroxiredoxin-2                                            | 10      |
| 10 | CYBP_HUMAN  | Calcyclin-binding protein                                  | 9       |
| 11 | ECH1_HUMAN  | Delta(3,5)-Delta(2,4)-dienoyl-CoA isomerase, mitochondrial | 9       |
| 12 | PRDX6_HUMAN | Peroxiredoxin-6                                            | 8       |
| 13 | PRDX4_HUMAN | Peroxiredoxin-4                                            | 8       |
| 14 | GBLP_HUMAN  | Guanine nucleotide-binding protein subunit beta-2-like 1   | 7       |
| 15 | MARE1_HUMAN | Microtubule-associated protein RP/EB family member 1       | 7       |
| 16 | ANXA5_HUMAN | Annexin A5                                                 | 6       |
| 17 | RS3_HUMAN   | 40S ribosomal protein S3                                   | 5       |
| 18 | MDHM_HUMAN  | Malate dehydrogenase, mitochondrial                        | 4       |
| 19 | EF1B_HUMAN  | Elongation factor 1-beta                                   | 4       |
| 20 | CPNS1_HUMAN | Calpain small subunit 1                                    | 4       |
| 21 | RS8_HUMAN   | 40S ribosomal protein S8                                   | 3       |
| 22 | CN166_HUMAN | UPF0568 protein C14orf166                                  | 3       |
| 23 | PSA5_HUMAN  | Proteasome subunit alpha type-5                            | 3       |
| 24 | ANXA1_HUMAN | Annexin A1                                                 | 3       |
| 25 | PSMG1_HUMAN | Proteasome assembly chaperone 1                            | 3       |
| 26 | ECHM_HUMAN  | Enoyl-CoA hydratase, mitochondrial                         | 2       |
| 27 | EF1D_HUMAN  | Elongation factor 1-delta                                  | 2       |
| 28 | LYPA1_HUMAN | Acyl-protein thioesterase 1                                | 2       |
| 29 | PSME1_HUMAN | Proteasome activator complex subunit 1                     | 2       |
| 30 | PSME3_HUMAN | Proteasome activator complex subunit 3                     | 2       |
| 31 | HSPB1_HUMAN | Heat shock protein beta-1                                  | 2       |
| 32 | CLIC1_HUMAN | Chloride intracellular channel protein 1                   | 2       |
| 33 | PSA4_HUMAN  | Proteasome subunit alpha type-4                            | 2       |
| 34 | EI2BA_HUMAN | Translation initiation factor eIF-2B subunit alpha         | 2       |

**Figure S4.** 12 % SDS-PAGE of proteins eluted from *in vitro* fishing for partners of SLD and control pull-down. The list of proteins has been refined removing the common hits with the control experiments. Their best MASCOT identification of 3 independent experiments is reported with matched peptides.

## Comparison between SLD and SLD-Az biological properties

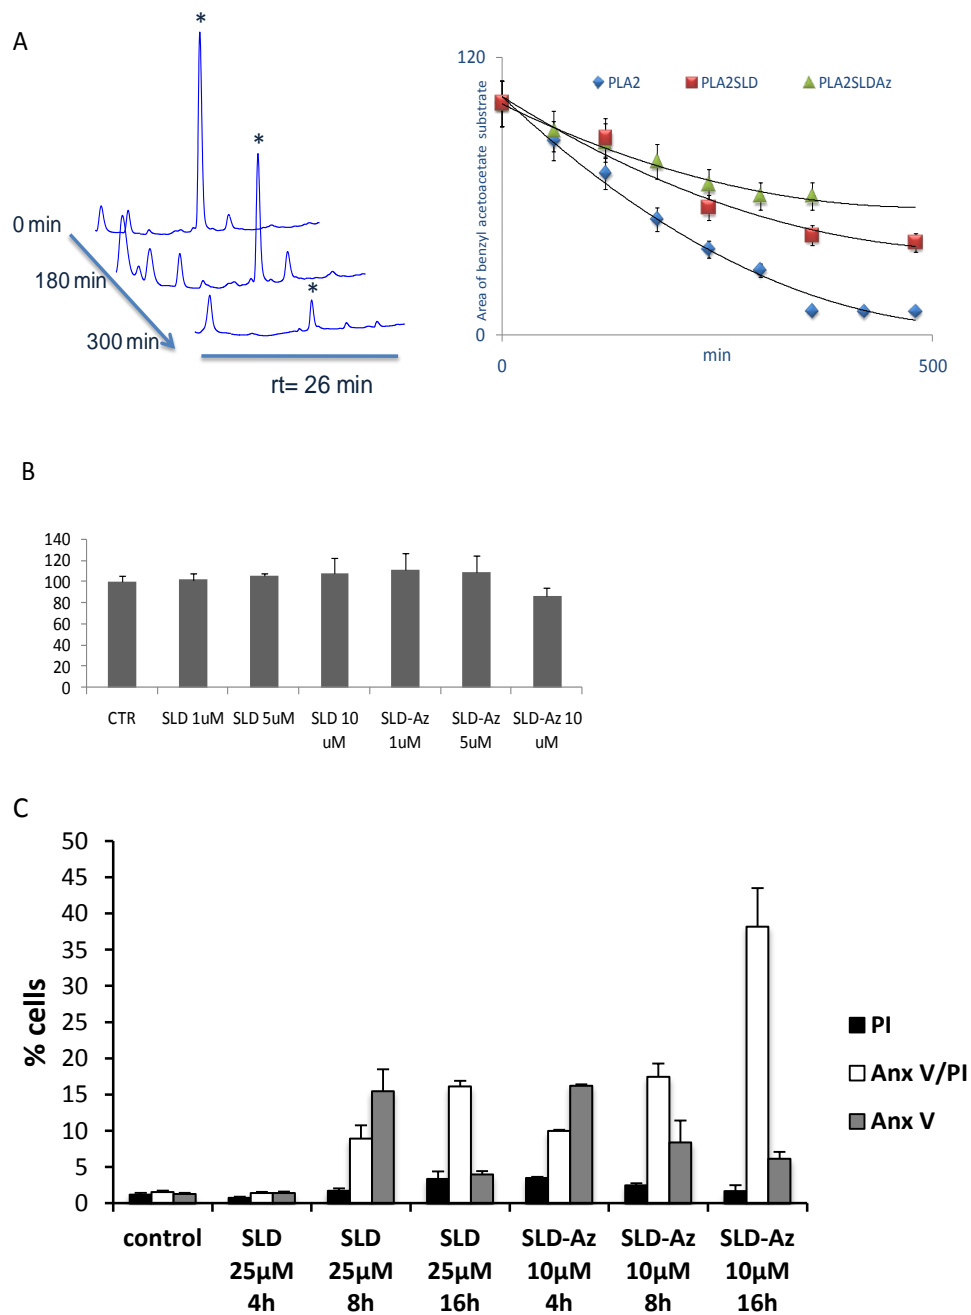

**Figure S5.** Panel A: RP-HPLC trace at 220 nm of the peak relative to benzyl acetoacetate (rt 26 min) which is selectively hydrolyzed by bee venom PLA<sub>2</sub> over time. The same experiment has been performed in presence of 10 fold molar excess of SLD and SLD-Az (over PLA<sub>2</sub> at 10 µM). The substrate area has been plotted over incubation time and SLD and SLD-Az inhibition curve are reported in the graph. Panel B: MTT analysis shows that both SLD and SLD-Az does not affect HeLa cell proliferation at tested doses. Panel C: Apoptosis analysis by Annexin V/PI staining shows that both molecules are able to induce apoptotic cell death, even if SLD-Az is effective at lower times and concentrations than SLD.

**In cell SLD interacting targets:**

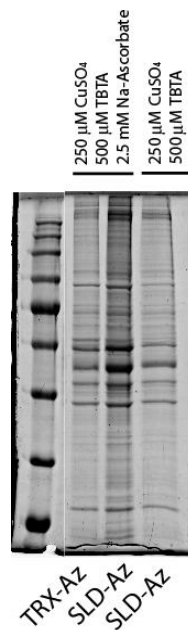

| n. SwissProt | Proteins    | Matches                                                                | n. SwissProt | Proteins | Matches      |                                                            |    |
|--------------|-------------|------------------------------------------------------------------------|--------------|----------|--------------|------------------------------------------------------------|----|
| 1            | FLNC_HUMAN  | Filamin-C                                                              | 104          | 46       | CSN2_HUMAN   | COP9 signalosome complex subunit 2                         | 21 |
| 2            | H13_HUMAN   | Histone H1.3                                                           | 80           | 47       | HGS_HUMAN    | epatocyte growth factor-regulated tyrosine kinase substrat | 20 |
| 3            | PARP1_HUMAN | Poly [ADP-ribose] polymerase 1                                         | 59           | 48       | SYFA_HUMAN   | Phenylalanine-tRNA ligase alpha subunit                    | 20 |
| 4            | U520_HUMAN  | U5 small nuclear ribonucleoprotein 200 kDa helicase                    | 57           | 49       | SEPT2_HUMAN  | Septin-2                                                   | 19 |
| 5            | EIF3A_HUMAN | Eukaryotic translation initiation factor 3 subunit A                   | 53           | 50       | LDHB_HUMAN   | L-lactate dehydrogenase B chain                            | 19 |
| 6            | CAND1_HUMAN | Cullin-associated NEDD8-dissociated protein 1                          | 53           | 51       | TPM4_HUMAN   | Tropomyosin alpha-4 chain                                  | 19 |
| 7            | XPO2_HUMAN  | Exportin-2                                                             | 51           | 52       | RAB1B_HUMAN  | Ras-related protein Rab-1B                                 | 18 |
| 8            | NSUN2_HUMAN | tRNA (cytosine(34)-C(5))-methyltransferase                             | 50           | 53       | RAN_HUMAN    | GTP-binding nuclear protein Ran                            | 18 |
| 9            | GFPT1_HUMAN | Glutamine-fructose-6-phosphate aminotransferase [isomerizing] 1        | 41           | 54       | TGM2_HUMAN   | Protein-glutamine gamma-glutamyltransferase 2              | 18 |
| 10           | SYQ_HUMAN   | Glutamine-tRNA ligase                                                  | 41           | 55       | H2B1M_HUMAN  | Histone H2B type 1-M                                       | 17 |
| 11           | CTNA1_HUMAN | Catenin alpha-1                                                        | 40           | 56       | RL21_HUMAN   | 60S ribosomal protein L21                                  | 17 |
| 12           | CND3_HUMAN  | Condensin complex subunit 3                                            | 39           | 57       | ARMC6_HUMAN  | Armadillo repeat-containing protein 6                      | 17 |
| 13           | DDX1_HUMAN  | ATP-dependent RNA helicase DDX1                                        | 36           | 58       | KPRA_HUMAN   | hosphoribosyl pyrophosphate synthase-associated protein    | 17 |
| 14           | ACLY_HUMAN  | ATP-citrate synthase                                                   | 36           | 59       | PRI1_HUMAN   | DNA primase small subunit                                  | 17 |
| 15           | LA_HUMAN    | Lupus La protein                                                       | 35           | 60       | SUGT1_HUMAN  | Suppressor of G2 allele of SKP1 homolog                    | 16 |
| 16           | RFC4_HUMAN  | Replication factor C subunit 4                                         | 35           | 61       | RCD1_HUMAN   | Cell differentiation protein RCD1 homolog                  | 16 |
| 17           | IPO4_HUMAN  | Importin-4                                                             | 33           | 62       | ARFG1_HUMAN  | ADP-ribosylation factor GTPase-activating protein 1        | 15 |
| 18           | IPO5_HUMAN  | Importin-5                                                             | 32           | 63       | FEN1_HUMAN   | Flap endonuclease 1                                        | 15 |
| 19           | GALK1_HUMAN | Galactokinase                                                          | 32           | 64       | HAT1_HUMAN   | Histone acetyltransferase type B catalytic subunit         | 14 |
| 20           | 1433F_HUMAN | 14-3-3 protein eta                                                     | 31           | 65       | ARF3_HUMAN   | ADP-ribosylation factor 3                                  | 14 |
| 21           | IDH3A_HUMAN | Isocitrate dehydrogenase [NAD] subunit alpha, mitochondrial            | 30           | 66       | INPP_HUMAN   | Inositol polyphosphate 1-phosphatase                       | 14 |
| 22           | RL26_HUMAN  | 60S ribosomal protein L26                                              | 30           | 67       | AN32B_HUMAN  | idic leucine-rich nuclear phosphoprotein 32 family member  | 14 |
| 23           | CN37_HUMAN  | 2',3'-cyclic-nucleotide 3'-phosphodiesterase                           | 29           | 68       | IMA7_HUMAN   | Importin subunit alpha-7                                   | 13 |
| 24           | 1433B_HUMAN | 14-3-3 protein beta/alpha                                              | 28           | 69       | PSA5_HUMAN   | Proteasome subunit alpha type-5                            | 13 |
| 25           | HNRH2_HUMAN | Heterogeneous nuclear ribonucleoprotein H2                             | 27           | 70       | LAT1_HUMAN   | Large neutral amino acids transporter small subunit 1      | 13 |
| 26           | PLIN3_HUMAN | Perilipin-3                                                            | 26           | 71       | UBC12_HUMAN  | NEDD8-conjugating enzyme Ubc12                             | 13 |
| 27           | EHD4_HUMAN  | EH domain-containing protein 4                                         | 26           | 72       | PRDX4_HUMAN  | Peroxiredoxin-4                                            | 12 |
| 28           | RAB7A_HUMAN | Ras-related protein Rab-7a                                             | 25           | 73       | PSB5_HUMAN   | Proteasome subunit beta type-5                             | 12 |
| 29           | FA98B_HUMAN | Protein FAM98B                                                         | 25           | 74       | RLA2_HUMAN   | 60S acidic ribosomal protein P2                            | 11 |
| 30           | PRS6B_HUMAN | 26S protease regulatory subunit 6B                                     | 24           | 75       | RAB6A_HUMAN  | Ras-related protein Rab-6A                                 | 11 |
| 31           | ACT2_HUMAN  | Alpha-actractin                                                        | 24           | 76       | IF5A1_HUMAN  | Eukaryotic translation initiation factor 5A-1              | 10 |
| 32           | ESYT1_HUMAN | Extended synaptotagmin-1                                               | 24           | 77       | ITPA_HUMAN   | Inosine triphosphate pyrophosphatase                       | 10 |
| 33           | IMA1_HUMAN  | Importin subunit alpha-1                                               | 23           | 78       | SQSTM1_HUMAN | Sequestosome-1                                             | 10 |
| 34           | PSA7_HUMAN  | Proteasome subunit alpha type-7                                        | 22           | 79       | PURB_HUMAN   | Transcriptional activator protein Pur-beta                 | 10 |
| 35           | PRS4_HUMAN  | 26S protease regulatory subunit 4                                      | 22           | 80       | RFC2_HUMAN   | Replication factor C subunit 2                             | 10 |
| 36           | GLRX3_HUMAN | Glutaredoxin-3                                                         | 22           | 81       | SAE1_HUMAN   | SUMO-activating enzyme subunit 1                           | 8  |
| 37           | PRS8_HUMAN  | 26S protease regulatory subunit 8                                      | 22           | 82       | TAGL2_HUMAN  | Transgelin-2                                               | 8  |
| 38           | TNPO3_HUMAN | Transportin-3                                                          | 22           | 83       | RL37A_HUMAN  | 60S ribosomal protein L37a                                 | 8  |
| 39           | RAB8A_HUMAN | Ras-related protein Rab-8A                                             | 21           | 84       | RBMS1_HUMAN  | RNA-binding motif, single-stranded-interacting protein 1   | 8  |
| 40           | PRS6A_HUMAN | 26S protease regulatory subunit 6A                                     | 21           | 85       | RL38_HUMAN   | 60S ribosomal protein L38                                  | 6  |
| 41           | PROF1_HUMAN | Profilin-1                                                             | 21           | 86       | PRDX1_HUMAN  | Peroxiredoxin-1                                            | 6  |
| 42           | PRS7_HUMAN  | 26S protease regulatory subunit 7                                      | 21           | 87       | F127C_HUMAN  | Protein FAM127C                                            | 6  |
| 43           | UBQL4_HUMAN | Ubiquilin-4                                                            | 21           | 88       | NDRG1_HUMAN  | Protein NDRG1                                              | 6  |
| 44           | DDX17_HUMAN | Probable ATP-dependent RNA helicase DDX17                              | 21           | 89       | ML12A_HUMAN  | Myosin regulatory light chain 12A                          | 5  |
| 45           | PP2AB_HUMAN | Serine/threonine-protein phosphatase 2A catalytic subunit beta isoform | 21           | 90       | PRDX2_HUMAN  | Peroxiredoxin-2                                            | 5  |

**Figure S6.** 12% SDS-PAGE of proteins eluted from *in cell* fishing for partners of SLD and control pull-down. The list of proteins has been refined removing the common hits with the control experiments. Their best MASCOT identification of 3 independent experiments is reported with matched peptides.

## Material and Methods

### Design and Synthesis of SLD-AZ:

SLD (1.5 mM) was coupled with 11-azido-3,6,9-trioxaundecan-1-amine (TRX-AZ, 15 mM) in ACN at 0.5% TEA for 1h at 25°C under stirring. Product formation has been monitored by RP-HPLC-UV at 220 nm using Agilent 1100 binary pump and Phenomenex column (Jupiter C18 150X2 mm 5  $\mu$ ) at 0.2 mL/min. Gradient was from 5% to 95% buffer B (A= 100% H<sub>2</sub>O and 0.1% TFA and B= 95% ACN, 5% H<sub>2</sub>O and 0.1% TFA) in 25 min. Mass spectra were acquired on LCQ-DECA ThermoFinnigan equipped with an ESI source.

### Click Chemistry Optimization:

SLD-Az (1.25 mM) has been incubated with the linker 4-pentyn-1-amine (PINA linker 2.50 mM) in PBS at pH 7.4 for 1h and less than 10% DMSO with 100  $\mu$ M CuSO<sub>4</sub>, 5 mM Na-L-(+)-Ascorbate and 100  $\mu$ M Tris [(1-benzil-1,2,3-triazol-4-yl)metal]amine (TBTA) under nitrogen and stirring. Product formation has been monitored by RP-HPLC-UV and MS as reported above.

500  $\mu$ L of CDI resin have been mixed with 5  $\mu$ mol of PINA linker in PBS buffer at pH of 7.4 for 3h at r.t.

### In-Vitro Proteome Profiling:

SLD (0.6 mM) has been linked to a 2-(2-amino-ethyl-disulfanyl)-ethyl-amine linker (TIOS 6 mM) in ACN at 0.5% TEA for 30 min at r.t. Product formation has been monitored by RP-HPLC-UV at 220 nm using Agilent 1100 binary pump and Phenomenex column (Jupiter C18 150X2 mm 5  $\mu$ ) at 0.2 mL/min. Gradient was from 5% to 95% buffer B (A= 100% H<sub>2</sub>O and 0.1% TFA and B= 95% ACN, 5% H<sub>2</sub>O and 0.1% TFA) in 20 min. Mass spectra were acquired on LCQ-DECA Thermo Finnigan equipped with an ESI source. SLD-TIOS (2.7  $\mu$ mol) has been immobilized on 400  $\mu$ L of CDI agarose in a final volume of 800  $\mu$ L of ACN/NaHCO<sub>3</sub> 50 mM for 16 h under stirring at room temperature. HPLC runs were carried out as reported above at 4 different times as 0, 2, 4, 16 h. Control resin has been prepared using 400  $\mu$ L of CDI CDI agarose in ACN/NaHCO<sub>3</sub> 50 mM using 0.7  $\mu$ mol of TIOS linker alone. Free amine active groups on the resins were quenched by acetic anhydride 50 mM at r.t. A Kaiser test has been performed to verify the absence of free amines on modified resins.

A sample of bovine serum albumin, lysozyme and bee venom PLA<sub>2</sub> (all from Sigma-Aldrich) at concentration of 2  $\mu$ M were mixed with SLD-bound beads suspension (50  $\mu$ L) and the same amount of the control unbound matrix under continuous shaking (1 h, 4°C). The beads were collected by centrifugation (865g, 1 min, 4°C) and washed three times with PBS (pH 7.4). The bound proteins were eluted by boiling the beads in SDS-PAGE sample buffer (60 mM Tris/HCl pH 6.8, 2% SDS, 0.001% bromophenol blue, 10% glycerol, 2% 2-mercaptoethanol). The eluted proteins were separated on 10% SDS-PAGE, and stained with Coomassie G-250 (Bio-Rad, Hercules, CA).

HeLa cells were grown in Dulbecco's modified Eagle medium (DMEM) supplemented with 10% (v/v) fetal bovine serum, 100 U/ml penicillin, 100 mg/ml streptomycin, at 37°C in a 5% CO<sub>2</sub> atmosphere (all reagents were from Euroclone). Cells were collected by centrifugation (600g, 5 min), washed twice with PBS and re-suspended in 1X ice cooled PBS containing Igepal (0.1%), supplemented with a protease inhibitor cocktail, and lysed by Dounce manual homogenization. Cellular debris were removed by centrifugation at 10000g for 10 min at 4 °C. Protein concentration was determined using Bradford assay and adjusted to 1 mg/ml. SLD-bound beads suspension (50  $\mu$ L) and the same amount of the control



unbound matrix were separately incubated with 1 mg of HeLa total protein extract under continuous shaking (1 h, 4°C). The beads were collected by centrifugation (865g, 1 min, 4°C) and washed six times with PBS (pH 7.4). The bound proteins were eluted by boiling the beads in SDS-PAGE sample buffer (60 mM Tris/HCl pH 6.8, 2% SDS, 0.001% bromophenol blue, 10% glycerol, 2% 2-mercaptoethanol). The eluted proteins were separated on 12% SDS-PAGE, and stained with Coomassie G-250 (Bio-Rad, Hercules, CA). SDS-PAGE gel lanes were cut and digested. The experiment has been repeated twice using an opportune control matrix bearing the linker without any metabolite. Each piece was washed with ultrapure water and CH<sub>3</sub>CN and subjected to in situ protein digestion as described by Shevchenko.<sup>27</sup> Briefly, each slice was reduced with 10 mM 1,4-dithiothreitol (DTT) and alkylated with 54 mM iodoacetamide, then washed and rehydrated in trypsin solution (12 ng/μL) on ice for 1 h. After the addition of ammonium bicarbonate (30 μL, 50 mM, pH 7.5), protein digestion was allowed to proceed overnight at 37°C. The supernatants were collected and peptides were extracted from the slices using 100% CH<sub>3</sub>CN and both supernatants were combined. The peptide samples were dried and dissolved in formic acid (FA, 10%) before MS analysis. The peptide mixtures (5 μL) were injected into a nano-ACQUITY UPLC system (Waters). Peptides were separated on a 1.7 mm BEH C18 column (Waters) at a flow rate of 400 nL/min. Peptide elution was achieved with a linear gradient (solution A: 95 % H<sub>2</sub>O, 5 % CH<sub>3</sub>CN, 0.1% FA; solution B: 95 % CH<sub>3</sub>CN, 5 % H<sub>2</sub>O, 0.1 % FA); 15–50% B over 55 min). MS and MS/MS data were acquired on a LTQ Orbitrap XL mass spectrometry system (Thermo Scientific). The ten most intense doubly and triply charged peptide ions were chosen and fragmented. The resulting MS data were processed by Mass Matrix MS data file conversion tool to generate mgf files for protein identifications. Database searches were carried out on the Mascot server (<http://www.matrixscience.com/>). The SwissProt database (release 2012\_03, 21 March 2012, 535248 sequence entries, 189901164 amino acids abstracted from 208076 references) was employed (settings: two missed cleavages; carbamidomethyl (C) as fixed modification and oxidation (M) and phosphorylation (ST) as variable modifications; peptide tolerance 25 ppm; MS/MS tolerance 0.8 Da).

Later on, eluted proteins were separated on 12% SDS-page and transferred to a nitrocellulose membrane. The membrane was incubated for 1 h in a blocking solution containing 25 mM Tris pH 8, 125 mM NaCl, 0.05% Tween-20, 5% non-fat dried milk prior of exposition to primary antibodies raised against 14-3-3 ε (1:500) and PRX1 (1: 500; Novus Biologicals) overnight, at 4°C. Then, membrane was incubated for 1 h with an anti-rabbit peroxidase-conjugated secondary antibody (1:5000) (Sigma-Aldrich). 14-3-3- ε and PRX1 were detected by a chemo-luminescent detection system.

14-3-3 ε and PRX1 were immobilized onto two different flow cells of a CM5 sensor chip using standard amine coupling procedures. Phosphate-buffered saline, which consisted of 10 mM Na<sub>2</sub>HPO<sub>4</sub> and 150 mM NaCl, pH 7.4, was used as running buffer. The carboxymethyl dextran surface was activated as already described and both proteins were diluted to a final concentration of 30 ng/μl in 10 mM sodium acetate, pH 4.5 and injected separately onto the two flow cells at a flow rate of 5 μl/min. After protein injections an increase of ≈9000 RU for PRX1 and ≈14000 RU for 14-3-3 was reached. The activated carboxymethyl dextran surface was finally blocked with a 7-min injection of 1.0 M ethanolamine-HCl, pH 8.5, at 5 μl/min. SLD solutions (0.01-10 μM), were prepared in running buffer containing 1% of DMSO and injected at least three times. Since they dissociated back to baseline within a reasonable time frame, no regeneration was required. The interaction experiments were carried out at a flow rate of 10 μl/min, employing a 3 min injection time. The dissociation time was set at 600 seconds. Rate constants for associations ( $k_a$ ) dissociations ( $k_d$ ) and the dissociation constants ( $K_D$ ) were obtained by globally

fitting data from injections of all concentrations, using the BIAevaluation software, using the simple 1:1 Langmuir binding model.

**In-Situ Proteome Profiling:** SLD-AZ (1 and 10  $\mu\text{M}$ ) was incubated in HeLa cell lysate (obtained as described above) for 1 h at 4°C and then mixed with 50  $\mu\text{L}$  of CDI-Agarose matrix bearing PINA linker in presence of  $\text{CuSO}_4$ , Na-L-(+)-Ascorbate and TBTA under nitrogen for 45 min at room temperature. As control, the experiment has been carried out in the same conditions using TRX-Az as bait. After several washes in PBS buffer to remove the unbound proteins, SLD partners were eluted, separated by 12% SDS-PAGE and transferred onto a nitrocellulose membrane. The membrane was incubated for 1 h in a blocking solution containing 25 mM Tris pH 8, 125 mM NaCl, 0.1% Tween-20, 5% nonfat dried milk prior to overnight incubation, at 4°C, with a primary monoclonal antibody raised against 14-3-3  $\epsilon$  (1:500) and PRX1 (1: 500). Then, membrane was incubated for 1 h with an anti-rabbit peroxidase-conjugated secondary antibody (1:5000). 14-3-3-  $\epsilon$  and PRX1 were detected by a chemo-luminescent detection system.

#### **Biological evaluation of SLD and SLD-Az:**

A solution of bee venom PLA<sub>2</sub> at 10  $\mu\text{M}$  has been incubated with or without SLD and SLD-Az, separately, at 100  $\mu\text{M}$  for 20 min at 37 °C under stirring and then benzyl-acetoacetate has been added at final concentration of 500  $\mu\text{M}$  in PBS buffer containing  $\text{CaCl}_2$ . Aliquots of the mixture were injected on a RP-HPLC Agilent 1100 equipped with a C-8 proteo column (Phenomenex) at different times from 0 to 480 min of incubation. The area of the peak at 26 min (identified as benzyl-acetoacetate in control runs at  $\lambda$  of 220 nm) was measured.

Cell viability was assessed by 3-(4,5-dimethylthiazol-2-yl)-2,5-diphenyltetrazolium bromide (MTT) assay. After SLD and SLD-Az treatments in a concentration range from 1  $\mu\text{M}$  to 10  $\mu\text{M}$ , the mitochondrial-dependent reduction of 3-(4,5-dimethylthiazol-2-yl)-2,5-diphenyltetrazolium bromide (MTT) to formazan was used to assess the effect of the two molecules on cell viability.

Apoptosis was evaluated by Annexin V-PI staining kit (Clontech), according to the manufacturer instructions. Briefly,  $1 \times 10^5$  HeLa cells were seeded in 12-well plates before SLD and SLD-Az administration for 4, 8, and 16h. Then cells were harvested, stained for Annexin V-PI and analysed with a FACScan flow cytometer (Becton Dickinson).

**Large-Scale Pull-Down/LC-MS/MS analysis:** Living HeLa cells were growth as described above, treated with 1  $\mu\text{M}$  of SLD-AZ and 1  $\mu\text{M}$  of TRX-Az for 6 hours and then washed with fresh media to remove the excess of drug which did not pass through cell membranes. Cells were then lysed by PBS containing 0.1% IGEPAL and proteases inhibitor by Dounce manual homogenator. 1 mg of lysates were then treated with 250  $\mu\text{M}$   $\text{CuSO}_4$ , 2.5 mM Na-L-(+)-Ascorbate and 500  $\mu\text{M}$  TBTA under nitrogen to promote Huisgen 1,3 cycloaddition on 10  $\mu\text{L}$  of PINA derived CDI-Agarose beads for 45 min at room temperature. The same reaction was carried out both on the same sample without 2.5 mM Na-L-(+)-Ascorbate and on TRX-Az treated cell lysates as negative controls. Pull-down samples were then separated by SDS-PAGE followed both by immune-blotting analysis as described above or Coomassie staining. SDS-PAGE gel lanes were cut and digested as reported above. Western blotting analysis on proteasome were carried out using primary monoclonal antibodies raised against  $\alpha$ -7 (1:500) and Psmc3 (1: 500, Santa Cruz Biotechnology). Then, membrane was incubated for 1 h with an anti-mouse peroxidase-conjugated secondary antibody (1:5000). A chemo-luminescence detection system has been used.
